# Supplementary material for: Hyperventilation-induced heart rate response as a potential marker for cardiovascular disease
Source: PubMed Central journal article supplement (PMC6884614; doi:10.1038/s41598-019-54375-9), 2019-11-29
Supplement: 41598_2019_54375_MOESM1_ESM.pdf [file 41598_2019_54375_MOESM1_ESM.pdf]

## SUPPLEMENTAL INFORMATION

# Hyperventilation-induced heart rate response as a potential marker for cardiovascular disease

Selwynne Hawkins, BSc<sup>1</sup>; Dominik P Guensch, MD<sup>2,3</sup>; Matthias G Friedrich, MD<sup>4,5,6</sup> Giulia Vinco, MD<sup>4,7</sup>; MD; Gobinath Nadeshalingham, MSc<sup>8</sup>; Michel White, MD<sup>8</sup>; Francois-Pierre Mongeon, MD<sup>8</sup>; Elizabeth Hillier, BSc<sup>1</sup>; Tiago Teixeira, MD<sup>8,10</sup>; Jacqueline A Flewitt, MSc<sup>9</sup>; Balthasar Eberle, MD<sup>2</sup>; Kady Fischer, PhD<sup>2,3\*</sup>

|                                                                                          |   |
|------------------------------------------------------------------------------------------|---|
| Supplemental Figure 1: Correlation of HRR <sub>HV</sub> with Demographic Variables ..... | 2 |
| Supplemental Figure 2: ROC Curve .....                                                   | 3 |

**Supplemental Figure 1: Correlation of HRR<sub>HV</sub> with Demographic Variables**

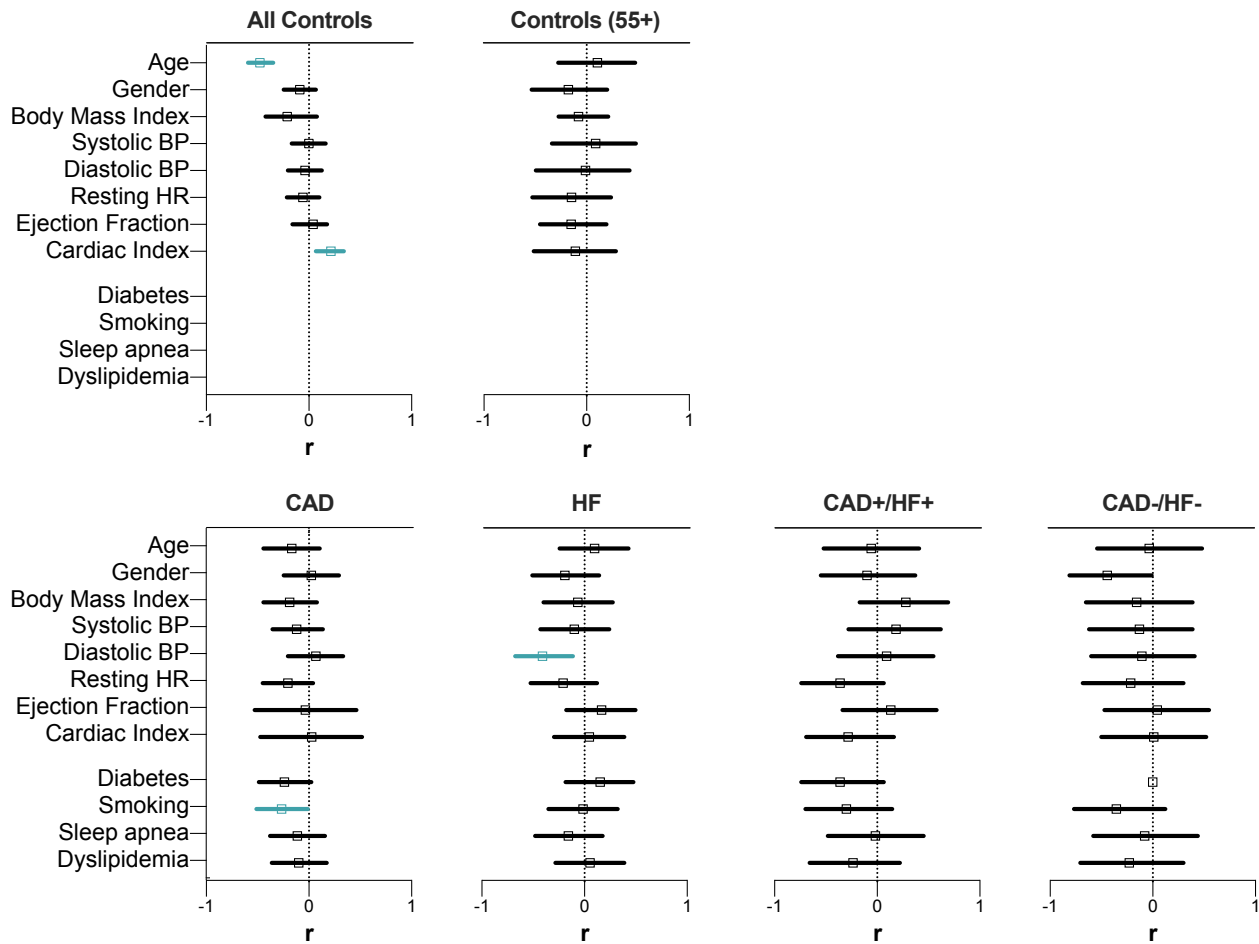

Linear analysis (*r*-coefficient with 95% confidence intervals) indicated that age, and cardiac index were associated with the heart rate response to hyperventilation (HRR<sub>HV</sub>) in all controls, but were not related to the HRR<sub>HV</sub> in the individual patient groups or controls aged 55 years and older. Blue markers indicate a significant correlation (\**p*<0.05).

**Supplemental Figure 2: ROC Curve**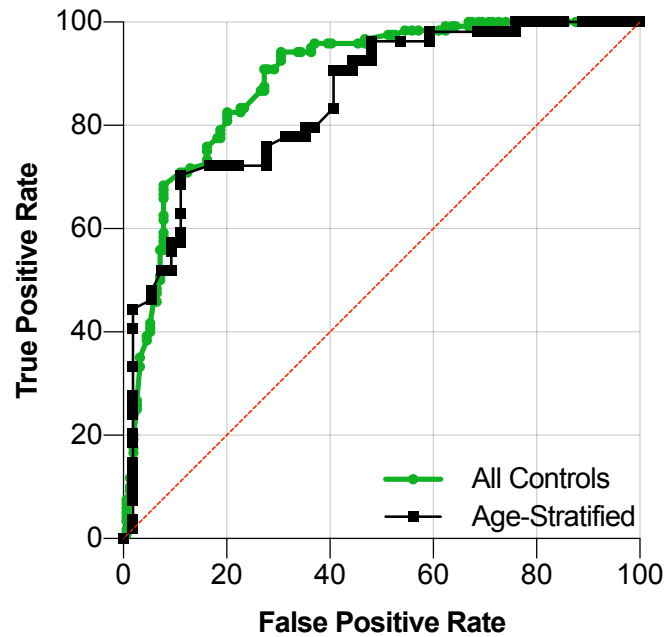

Receiver operator curve illustrating the diagnostic ability of binary classification (controls or combined cardiovascular disease group) based on the heart rate response to hyperventilation ( $HRR_{HV}$ ). The green curve represents analysis of all healthy controls ( $n=161$ ) in comparison to all patients ( $n=121$ ), which does not account for any age differences. After age stratification (black), the difference in heart rate response remained significant ( $n=54$  per group).
